# Supplementary material
Source: PubMed Central journal article supplement (PMC4925892)
Supplement: mmc1.pdf [file mmc1.pdf]

|                 |                    | 2-way | interaction | 1-way | 10° | 20° | 30° | 40° | 50° | 60° | 70° | 80° | 90° | 100° |     |     |
|-----------------|--------------------|-------|-------------|-------|-----|-----|-----|-----|-----|-----|-----|-----|-----|------|-----|-----|
| Humerothoracic  | Plane of Elevation | ***   | **          | F-W   | *** | *** | *** | *** | *** | *** | *** | *** | **  | *    | -   |     |
|                 |                    |       |             | F-R   | *** | *** | **  | **  | *** | *** | *** | *** | *** | **   | **  | *   |
|                 |                    |       |             | W-R   | *** | *** | *** | *** | *** | *** | *** | *** | *** | ***  | *** | *** |
|                 | Elevation          | *     | **          | F-W   | -   | -   | -   | -   | -   | -   | -   | -   | -   | -    | -   | -   |
|                 |                    |       |             | F-R   | -   | *   | -   | -   | -   | -   | -   | -   | -   | -    | *   | **  |
|                 |                    |       |             | W-R   | **  | -   | -   | -   | *   | *   | *   | *   | *   | **   | *** | *** |
|                 | Internal rotation  | ***   | -           | F-W   | -   | n/a |     |     |     |     |     |     |     |      |     |     |
|                 |                    |       |             | F-R   | *** |     |     |     |     |     |     |     |     |      |     |     |
|                 |                    |       |             | W-R   | **  |     |     |     |     |     |     |     |     |      |     |     |
| Scapulothoracic | Medial             | *     | *           | F-W   | -   | *   | *   | -   | -   | -   | -   | -   | -   | -    | -   |     |
|                 |                    |       |             | F-R   | -   | *   | -   | -   | -   | -   | -   | -   | -   | -    | -   | *   |
|                 |                    |       |             | W-R   | -   | -   | -   | -   | -   | -   | -   | -   | -   | -    | -   | -   |
|                 | Protraction        | -     | ***         | F-W   | -   | *** | *** | **  | *   | -   | -   | -   | -   | -    | -   | *   |
|                 |                    |       |             | F-R   | -   | -   | -   | -   | -   | -   | -   | -   | -   | -    | -   | -   |
|                 |                    |       |             | W-R   | -   | **  | *   | *   | -   | -   | -   | -   | -   | -    | -   | -   |
| Posterior tilt  | -                  | -     | F-W         | -     | n/a |     |     |     |     |     |     |     |     |      |     |     |
|                 |                    |       | F-R         | -     |     |     |     |     |     |     |     |     |     |      |     |     |
|                 |                    |       | W-R         | -     |     |     |     |     |     |     |     |     |     |      |     |     |
| Glenohumeral    | Plane of Elevation | -     | ***         | F-W   | -   | *   | -   | -   | -   | -   | -   | -   | -   | -    | -   |     |
|                 |                    |       |             | F-R   | -   | -   | -   | -   | -   | -   | -   | -   | -   | -    | -   |     |
|                 |                    |       |             | W-R   | -   | -   | -   | -   | *   | *   | -   | -   | -   | -    | *   |     |
|                 | Elevation          | ***   | ***         | F-W   | *** | -   | -   | -   | **  | *** | *** | *** | *** | ***  | *** | *** |
|                 |                    |       |             | F-R   | -   | *** | *** | **  | -   | -   | -   | *   | **  | **   | **  |     |
|                 |                    |       |             | W-R   | *** | *** | *** | **  | -   | *** | *** | *** | *** | ***  | *** | *** |
|                 | Internal rotation  | ***   | ***         | F-W   | *** | *** | *** | *** | *** | *** | *** | *** | *** | ***  | **  | *   |
|                 |                    |       |             | F-R   | *** | **  | **  | **  | *** | *** | *** | **  | **  | **   | **  |     |
|                 |                    |       |             | W-R   | *** | *** | *** | *** | *** | *** | *** | *** | *** | ***  | *** | *** |

Supplementary 1: Significance testing results. For the three rotations tested, the overall results of the two-way repeated measures ANOVA ("2-way") are presented. The interaction between pull-up technique (Front, Wide, Reverse) and percentage of motion (0-100%) are presented ("interaction"). The one-way repeated measures ANOVA results are also presented for all the combinations of comparison between the two pull-up types ("F-W" front-wide, "F-R" front-reverse, "W-R" wide-reverse). The results of the Bonferoni post-hoc tests are then presented for each 10% interval of the motion. \* indicates p<0.05, \*\* p<0.01, \*\*\* p<0.001.
